# Supplementary material
Source: PubMed Central journal article supplement (PMC3982709)
Supplement: 36c27cfc3f4fe126c33398df6eb9cfdb_genetics.114.161703-2.pdf [file 36c27cfc3f4fe126c33398df6eb9cfdb_genetics.114.161703-2.pdf]

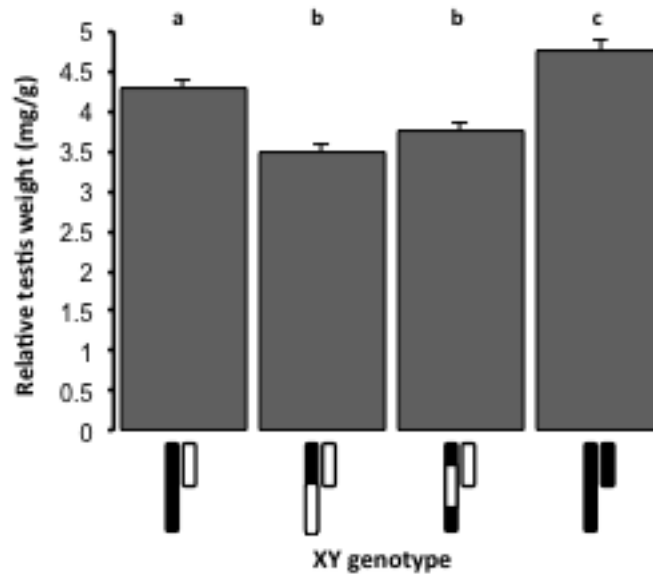

**Figure S1** Relative testis weight (RTW) in *domesticus*<sup>LEWES</sup> Y introgression males. Males with a *domesticus*<sup>LEWES</sup> Y (white) have significantly lower RTW than control males with a *musculus*<sup>PWK</sup> Y (black). Bars represent genotypic means, error bars are +1 SE, sample sizes are shown in Figure 1b. Pairwise differences were tested with ANOVA followed by Steel-Dwass *post hoc* tests. Genotypes not connected by the same letter are significantly different at experiment-wise  $\alpha = 0.05$ .
