# Supplementary material
Source: PubMed Central journal article supplement (PMC3982709)
Supplement: f7c144ad82c4872b2886c4781b62357c_genetics.114.161703-3.pdf [file f7c144ad82c4872b2886c4781b62357c_genetics.114.161703-3.pdf]

**Table S1 Chi-square statistic for tests of three alternative hypotheses for the minimum number of X-autosome incompatibilities required for infertile phenotype in F<sub>1</sub> males**

| Generation | RTW <sup>a</sup> |                   |                   | Sperm count |      |      |
|------------|------------------|-------------------|-------------------|-------------|------|------|
|            | X-A <sup>b</sup> | X-2A <sup>c</sup> | X-3A <sup>d</sup> | X-A         | X-2A | X-3A |
| N2         | 17*              | 5.7*              | 1.2               | 7.1*        | 0.5  | 3.5  |
| N3         | 2.4              | 0.01              | 0.3               | 0.9         | 1.4  | 3.4  |

<sup>a</sup>RTW, relative testis weight

<sup>b</sup>Infertility requires incompatibility between X and 1 autosomal dominant locus

<sup>c</sup>Infertility requires incompatibilities between X and 2 unlinked autosomal dominant loci with additive effects

<sup>d</sup>Infertility requires incompatibilities between X and 3 unlinked autosomal dominant loci with additive effects

\*Rejects hypothesis at  $\alpha = 0.05$
